# Supplementary material
Source: PubMed Central journal article supplement (PMC5507735)
Supplement: NIHMS866299-supplement-supplement_1.pdf [file NIHMS866299-supplement-supplement_1.pdf]

Supplemental Table 1: Physiological Dysregulation Components Measured in 2000

| Biological Markers                                                                                  | Cutoff value <sup>1</sup> |
|-----------------------------------------------------------------------------------------------------|---------------------------|
| <b>Cardiovascular/metabolic markers</b>                                                             |                           |
| Systolic blood pressure (the average of the second and third [out of three] seated readings ; mmHg) | ≥ 156                     |
| Diastolic blood pressure (the average of the second and third [out of three] seated readings mmHg)  | ≤ 69, ≥ 96                |
| Triglycerides (mg/dL)                                                                               | ≥ 160                     |
| Glycosylated hemoglobin (%)                                                                         | ≥ 6.1                     |
| Waist-hip ratio                                                                                     | ≥ 0.94                    |
| Resting pulse rate                                                                                  | ≥ 80                      |
| Total cholesterol (mg/dL)                                                                           | ≤ 153, ≥ 253              |
| high-density lipoprotein cholesterol (mg/dL)                                                        | ≤ 37                      |
| Fasting glucose (mg/dL)                                                                             | ≤ 84, ≥ 140               |
| <b>Inflammation markers</b>                                                                         |                           |
| White blood cell count (x 10 <sup>9</sup> /L)                                                       | ≥ 7.4                     |
| Neutrophils (%)                                                                                     | ≥ 64.9                    |
| Interleukin-6 (pg/mL)                                                                               | ≥ 4.5                     |
| high sensitivity C-reactive protein (pg/mL)                                                         | ≥ 0.40                    |
| soluble intercellular adhesion molecule-1 (ng/mL)                                                   | ≥ 318.8                   |
| Soluble E-selectin (ng/mL)                                                                          | ≥ 62.3                    |
| soluble IL-6 receptor (ng/mL)                                                                       | ≥ 61.7                    |
| <b>HPA/SNS Function</b>                                                                             |                           |
| Urinary cortisol (mcg/g creatinine)                                                                 | ≥ 33.4                    |
| Epinephrine (mcg/g creatinine)                                                                      | ≤ 0.07, ≥ 5.63            |
| Norepinephrine (mcg/g creatinine)                                                                   | ≥ 29.15                   |
| dehydroepiandrosterone-sulfate (mcg/dL)                                                             | ≤ 34.7                    |
| <b>OTHER markers</b>                                                                                |                           |
| insulin like growth factor-1 (ng/mL)                                                                | ≤ 64.3                    |
| Creatinine clearance (mL/min)                                                                       | ≤ 43.56                   |
| Albumin (g/dL)                                                                                      | ≤ 4.3                     |
| Homocysteine (mg/L)                                                                                 | ≥ 19.2                    |

<sup>1</sup> Cutoffs were established using the full 2000 biomarker sample.

Supplemental Table 2: Hazard ratios from Cox proportional hazard models of mortality (n=588<sup>a</sup>): Full models

|                                        | (baseline)       | Models           |                  |                  |                  |                  | Model                    | Model                    |
|----------------------------------------|------------------|------------------|------------------|------------------|------------------|------------------|--------------------------|--------------------------|
|                                        |                  | (1)              | (2)              | (3)              | (4)              | (5)              | Footnote c<br>in Table 3 | Footnote d<br>in Table 3 |
| Age in 2006                            | 1.06**<br>(0.02) | 1.05**<br>(0.02) | 1.05**<br>(0.02) | 1.04*<br>(0.02)  | 1.06**<br>(0.02) | 1.05**<br>(0.02) | 1.06**<br>(0.02)         | 1.06**<br>(0.02)         |
| Female                                 | 0.59<br>(0.20)   | 0.51<br>(0.18)   | 0.66<br>(0.22)   | 0.59<br>(0.20)   | 0.49*<br>(0.18)  | 0.57<br>(0.20)   | 0.56*<br>(0.14)          | 0.62<br>(0.15)           |
| Years of education                     | 1.04<br>(0.03)   | 1.06*<br>(0.03)  | 1.06*<br>(0.03)  | 1.08**<br>(0.03) | 1.06*<br>(0.03)  | 1.08**<br>(0.03) | 1.03<br>(0.02)           | 1.04<br>(0.02)           |
| Urban residence 2006                   | 0.87<br>(0.20)   | 0.88<br>(0.20)   | 0.87<br>(0.20)   | 0.88<br>(0.20)   | 0.87<br>(0.21)   | 0.86<br>(0.20)   |                          |                          |
| Currently married 2006                 | 0.65<br>(0.16)   | 0.65<br>(0.17)   | 0.76<br>(0.19)   | 0.69<br>(0.17)   | 0.61<br>(0.16)   | 0.65<br>(0.17)   |                          |                          |
| Number of chronic conditions 2006      | 1.03<br>(0.06)   | 0.97<br>(0.06)   | 1.00<br>(0.06)   | 0.95<br>(0.06)   | 0.95<br>(0.06)   | 0.92<br>(0.06)   |                          |                          |
| Cognitive function score 2006          | 0.90**<br>(0.03) | 0.93*<br>(0.03)  | 0.94*<br>(0.03)  | 0.95<br>(0.03)   | 0.93*<br>(0.03)  | 0.95<br>(0.03)   |                          |                          |
| Ever smoked 2006                       | 1.39<br>(0.38)   | 1.34<br>(0.38)   | 1.51<br>(0.42)   | 1.45<br>(0.41)   | 1.31<br>(0.38)   | 1.44<br>(0.41)   |                          |                          |
| Physiological dysregulation score 2000 |                  | 1.28**<br>(0.05) |                  | 1.25**<br>(0.05) |                  |                  | 1.30**<br>(0.05)         |                          |
| Frail 2006 (vs. not frail)             |                  |                  | 3.08**<br>(0.79) | 2.43**<br>(0.64) |                  | 2.52**<br>(0.66) |                          | 3.57**<br>(0.86)         |
| PD subscores 2000                      |                  |                  |                  |                  |                  |                  |                          |                          |
| CV/ metabolic risk (0-7)               |                  |                  |                  |                  | 1.34**<br>(0.10) | 1.30**<br>(0.10) |                          |                          |
| HPA/SNS (0-4)                          |                  |                  |                  |                  | 1.22<br>(0.15)   | 1.17<br>(0.15)   |                          |                          |
| Inflammation (0-6)                     |                  |                  |                  |                  | 1.33**<br>(0.11) | 1.31**<br>(0.11) |                          |                          |
| OTHER <sup>d</sup> (0-4)               |                  |                  |                  |                  | 1.10<br>(0.14)   | 1.03<br>(0.14)   |                          |                          |
| <i>Harrell's C</i>                     | 0.7089           | 0.7670           | 0.7483           | 0.7848           | 0.7669           | 0.7833           | 0.7594                   | 0.7429                   |

\*\* p<0.01, \* p<0.05; <sup>a</sup> Sample of respondents with complete data

CV=cardiovascular; HPA/SNS=Hypothalamic-pituitary-adrenocortical axis and sympathetic nervous system; OTHER biomarkers include: Insulin like growth factor-1 (IGF-1), creatinine clearance, albumin, homocysteine

Supplemental Table 3: Sensitivity Analyses: hazard ratios (Standard Errors) from Cox proportional hazard models of mortality including alternative forms of physiological dysregulation (PD)

|                                   | Average Z-Score |        | High Risk<br>Quartiles |        | Allostatic Load<br>(10-items) |        | 2006 PD Score |        |
|-----------------------------------|-----------------|--------|------------------------|--------|-------------------------------|--------|---------------|--------|
| Age in 2006                       | 1.05**          | 1.04** | 1.05**                 | 1.04** | 1.05**                        | 1.05** | 1.05**        | 1.05** |
|                                   | (0.02)          | (0.02) | (0.02)                 | (0.02) | (0.02)                        | (0.02) | (0.01)        | (0.01) |
| Female                            | 0.45*           | 0.54   | 0.46*                  | 0.55   | 0.44*                         | 0.51   | 0.48*         | 0.48*  |
|                                   | (0.16)          | (0.18) | (0.16)                 | (0.18) | (0.16)                        | (0.18) | (0.15)        | (0.15) |
| Years of education                | 1.05            | 1.07** | 1.05                   | 1.07** | 1.03                          | 1.05   | 1.03          | 1.04   |
|                                   | (0.03)          | (0.03) | (0.03)                 | (0.03) | (0.03)                        | (0.03) | (0.03)        | (0.03) |
| Urban residence 2006              | 0.86            | 0.87   | 0.90                   | 0.88   | 0.89                          | 0.89   | 0.90          | 0.90   |
|                                   | (0.20)          | (0.20) | (0.21)                 | (0.20) | (0.21)                        | (0.20) | (0.21)        | (0.21) |
| Currently married 2006            | 0.59*           | 0.64   | 0.64                   | 0.67   | 0.68                          | 0.76   | 0.66          | 0.68   |
|                                   | (0.15)          | (0.16) | (0.16)                 | (0.17) | (0.17)                        | (0.19) | (0.17)        | (0.18) |
| Number of chronic conditions 2006 | 0.96            | 0.93   | 0.97                   | 0.94   | 0.99                          | 0.96   | 1.01          | 0.99   |
|                                   | (0.06)          | (0.06) | (0.06)                 | (0.06) | (0.06)                        | (0.06) | (0.06)        | (0.06) |
| Cognitive function score 2006     | 0.92**          | 0.96   | 0.92**                 | 0.95   | 0.92**                        | 0.95   | 0.93*         | 0.95   |
|                                   | (0.03)          | (0.03) | (0.03)                 | (0.03) | (0.03)                        | (0.03) | (0.03)        | (0.03) |
| Ever smoked 2006                  | 1.23            | 1.34   | 1.28                   | 1.43   | 1.26                          | 1.36   | 1.00          | 1.03   |
|                                   | (0.34)          | (0.37) | (0.37)                 | (0.40) | (0.36)                        | (0.39) | (0.27)        | (0.28) |
| PD Average Z-score                | 7.16**          | 6.51** |                        |        |                               |        |               |        |
|                                   | (2.75)          | (2.49) |                        |        |                               |        |               |        |
| PD high risk quartile             |                 |        | 1.24**                 | 1.22** |                               |        |               |        |
|                                   |                 |        | (0.05)                 | (0.05) |                               |        |               |        |
| Allostatic Load (10-items)        |                 |        |                        |        | 1.34**                        | 1.32** | 1.31**        | 1.30** |
|                                   |                 |        |                        |        | (0.11)                        | (0.11) | (0.05)        | (0.05) |
| PD 2006                           |                 |        |                        |        |                               |        |               |        |
| Frail 2006 (vs. not frail)        |                 | 2.83** |                        | 2.69** |                               | 2.94** |               | 2.07** |
|                                   |                 | (0.71) |                        | (0.69) |                               | (0.75) |               | (0.52) |
| <i>Harrell's C-index</i>          | 0.7491          | 0.7743 | 0.7530                 | 0.7771 | 0.7361                        | 0.7705 | 0.8032        | 0.8072 |
| Observations                      | 588             | 588    | 588                    | 588    | 588                           | 588    | 936           | 936    |

\*\* p<0.01, \* p<0.05
